# Supplementary material for: Heteroleptic copper(i) halides with triphenylphosphine and acetylthiourea: synthesis, characterization and biological studies (experimental and molecular docking)
Source: Royal Society of Chemistry journal article supplement (doi:10.1039/c9nj03005k), 2019-01-01

## **Heteroleptic Copper (I) halides with triphenylphosphine and acetylthiourea: Synthesis, Characterization and Biological Studies (Experimental and Molecular Docking)**

Syed Ishtiaq Khan<sup>a,c,1</sup>, Sajjad Ahmad<sup>b,1</sup>, Ataf Ali Altaf<sup>d</sup>, Muhammad Khawar Rauf<sup>a</sup>, Amin Badshah<sup>a\*</sup>, Syed Sikander Azam<sup>b\*</sup>, Muhammad Nawaz Tahir<sup>e</sup>

<sup>1</sup>Both the authors contributed equally to this work.

<sup>a</sup>Department of Chemistry, Quaid-i-Azam University, Islamabad 45320, Pakistan

<sup>b</sup>Computational Biology Lab, National Center for Bioinformatics, Quaid-i-Azam University, Islamabad, Pakistan

<sup>c</sup>Geoscience Advance Research Laboratories Geological Survey of Pakistan, Islamabad, Pakistan.

<sup>d</sup>Department of Chemistry, University of Gujrat, hafiz Hayat Campus, Gujrat-50700, Pakistan.

<sup>e</sup>Department of Physics, University of Sargodha, Sargodha Pakistan.

**\*Corresponding Author e-mails:** [aminbadshah@yahoo.com](mailto:aminbadshah@yahoo.com) (A. Badshah);  
[syedazam2008@gmail.com](mailto:syedazam2008@gmail.com), [ssazam@qau.edu.pk](mailto:ssazam@qau.edu.pk) (S. S. Azam)

### **Supplementary Data**

Along with following figures and tables NMR spectra of selected compounds have also been provided as pdf files in supplementary information of the article.

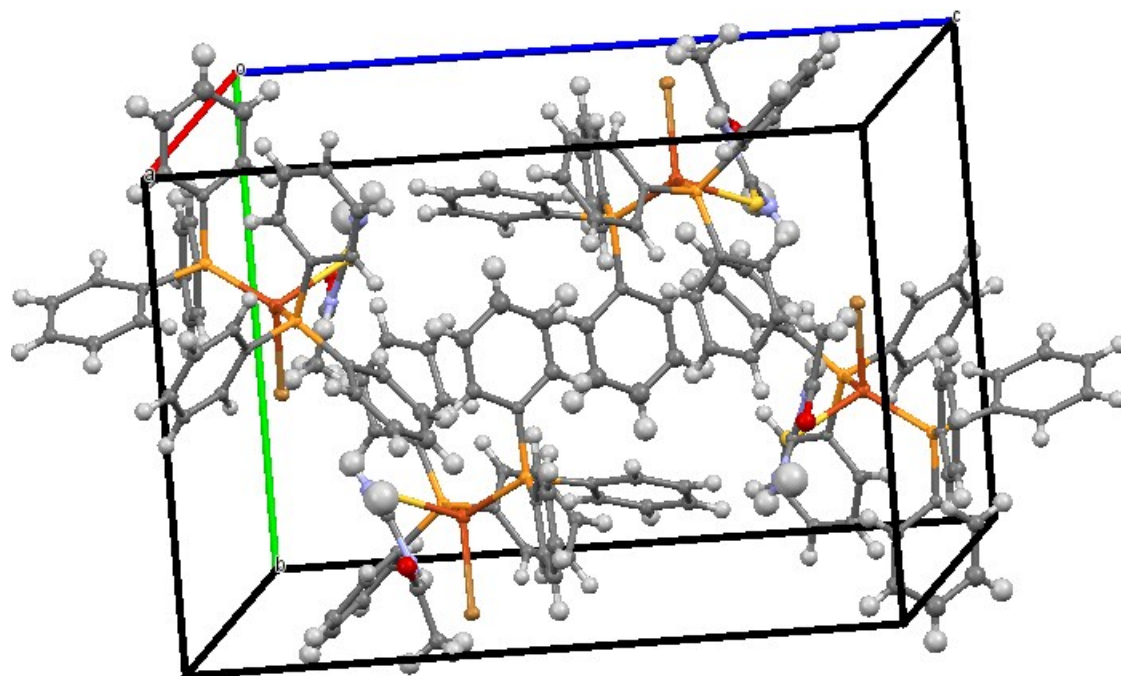

**Figure S1.** Packing Diagram of complex-A2.

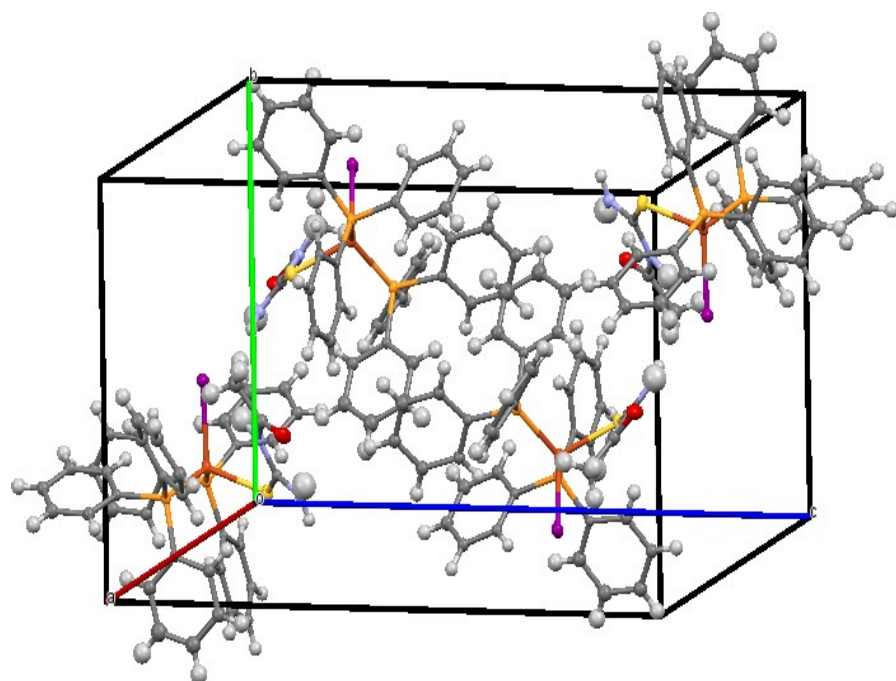

**Figure S2.** Packing Diagram of complex-A3.

MurF-IV Complex

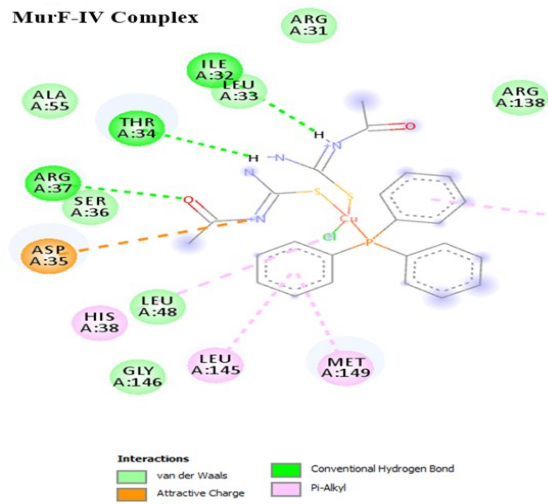

KdsB-IV Complex

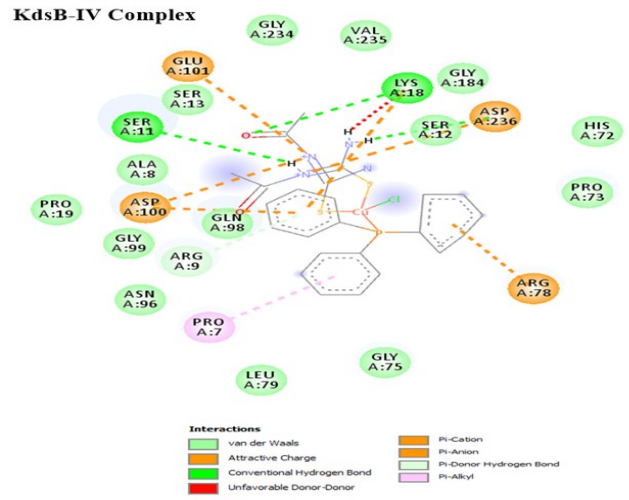

FabH-IV Complex

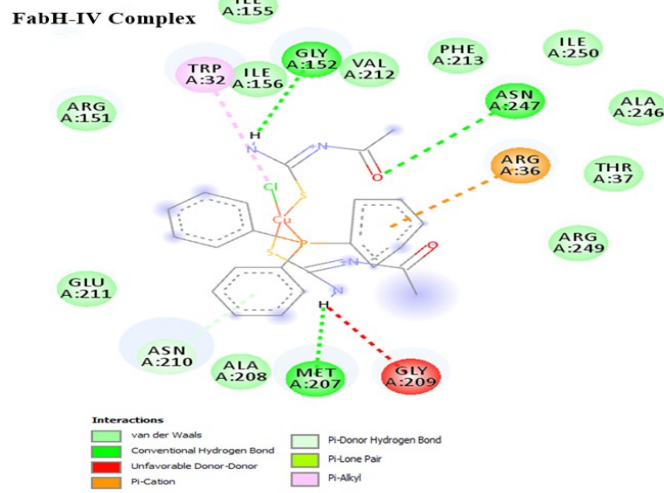

TR-IV Complex

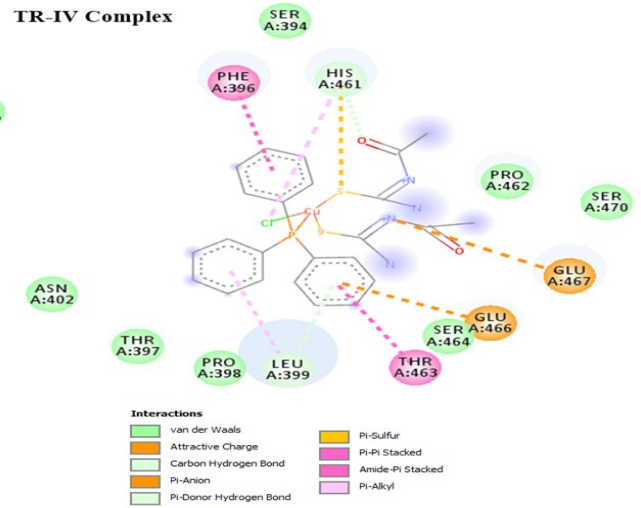

BCL2-IV Complex

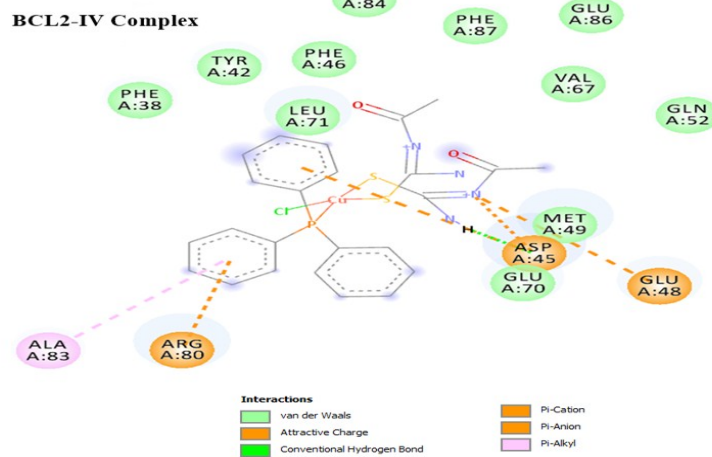

Figure S3. Binding mode and interaction of A4 in the active pocket of different receptor enzyme.

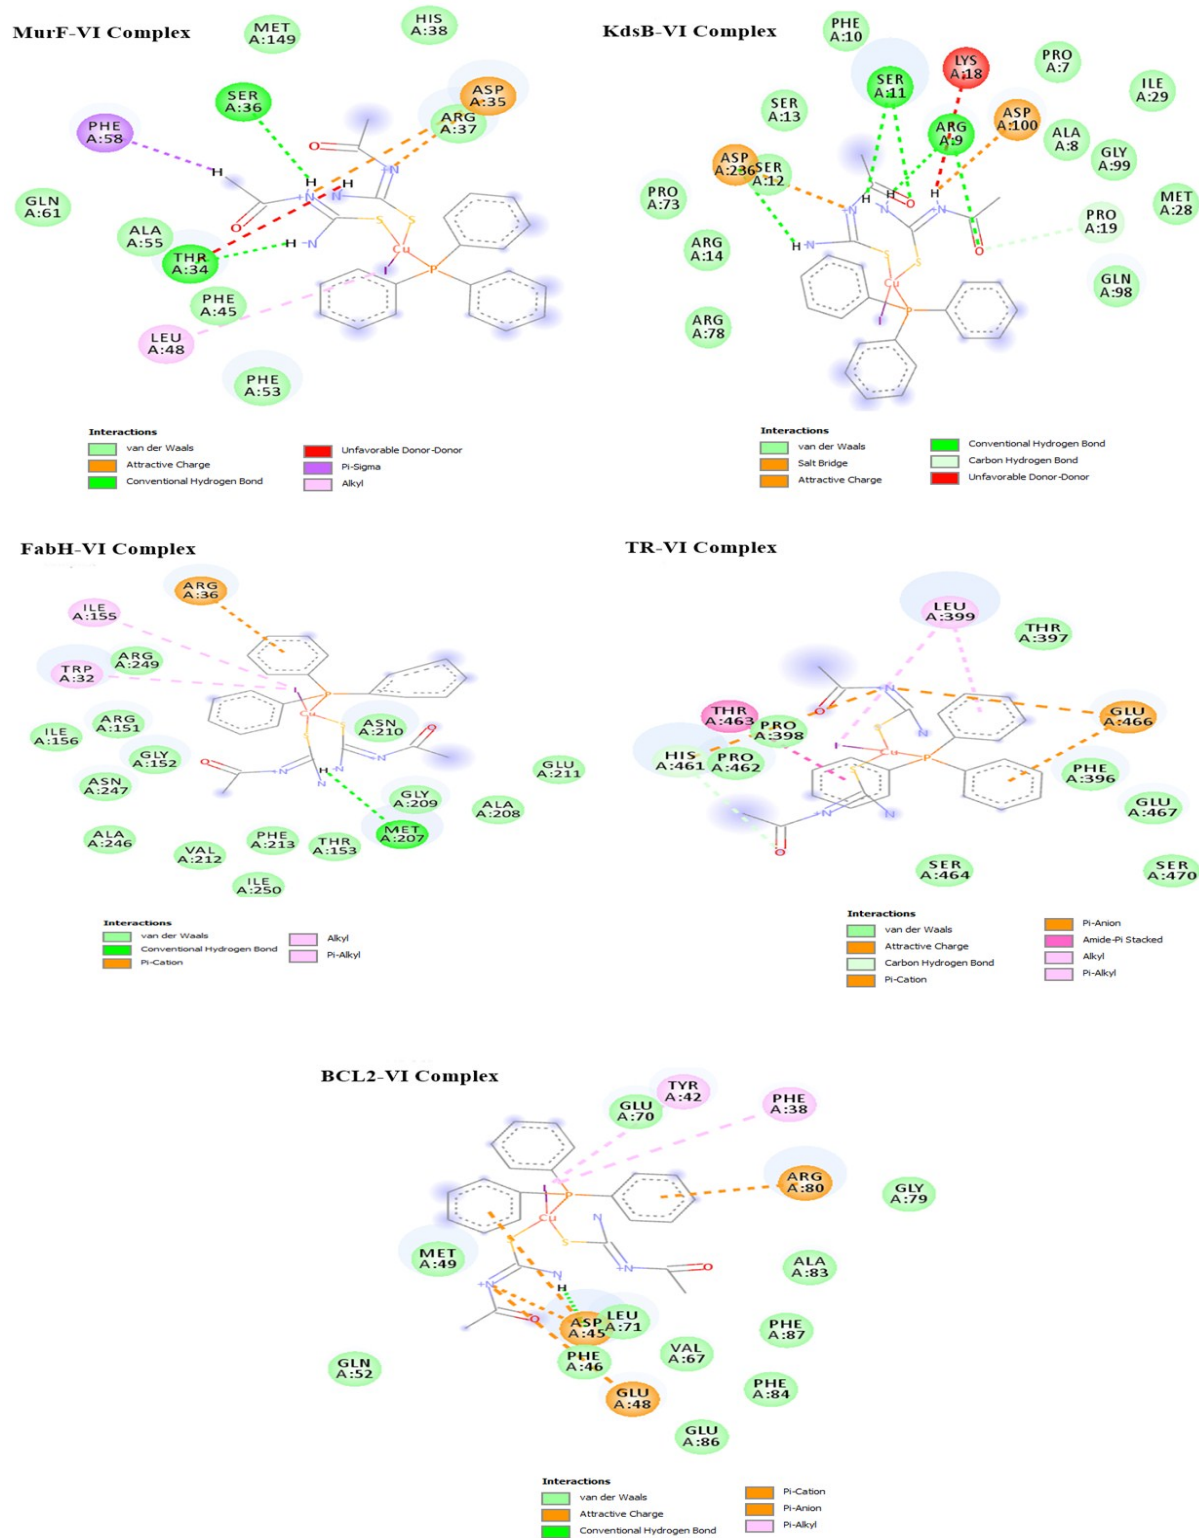

**Figure S4.** Binding mode and interaction of A6 in the active pocket of different receptor enzyme.

Chart X. Structures of literature reported compounds X1 – X9 used for the comparison biological activities results.

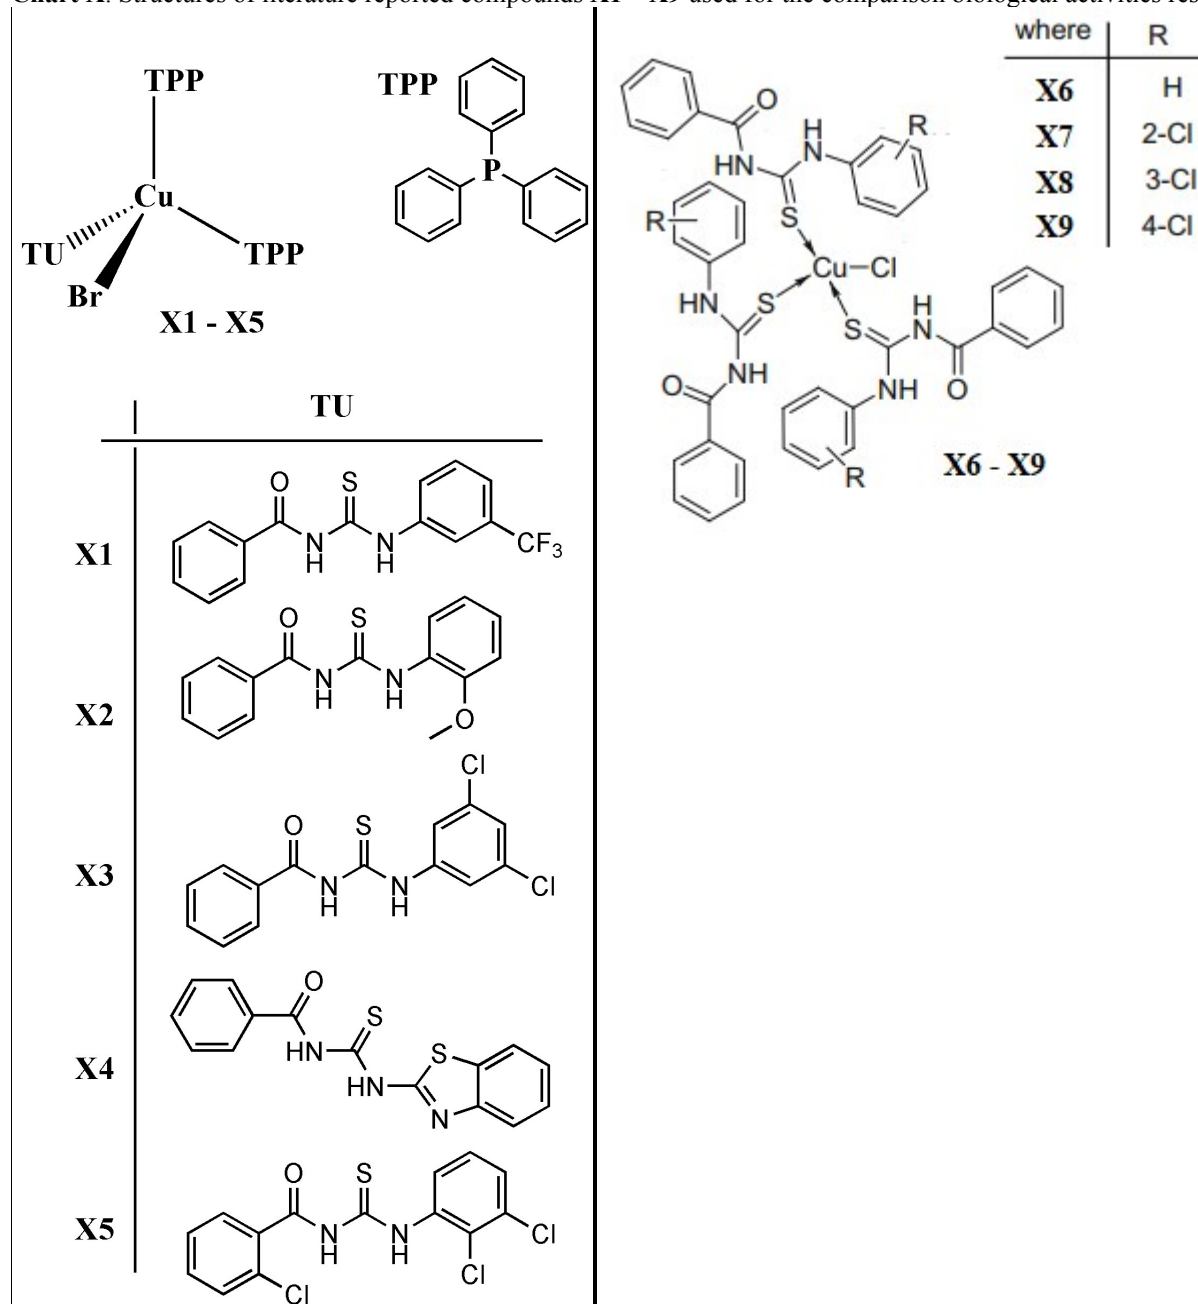

Supplement: c9nj03005k9.pdf [file c9nj03005k9.pdf]
