# Supplementary figures and images for: Heteroleptic copper(i) halides with triphenylphosphine and acetylthiourea: synthesis, characterization and biological studies (experimental and molecular docking)
Source: Royal Society of Chemistry journal article supplement (doi:10.1039/c9nj03005k), 2019-01-01

DZ-IS-4.12 2 1 "D:\Data For thesis\Ishtiaq PhD papers\NMR of the Pak work\IS-4.1 to 4.9"

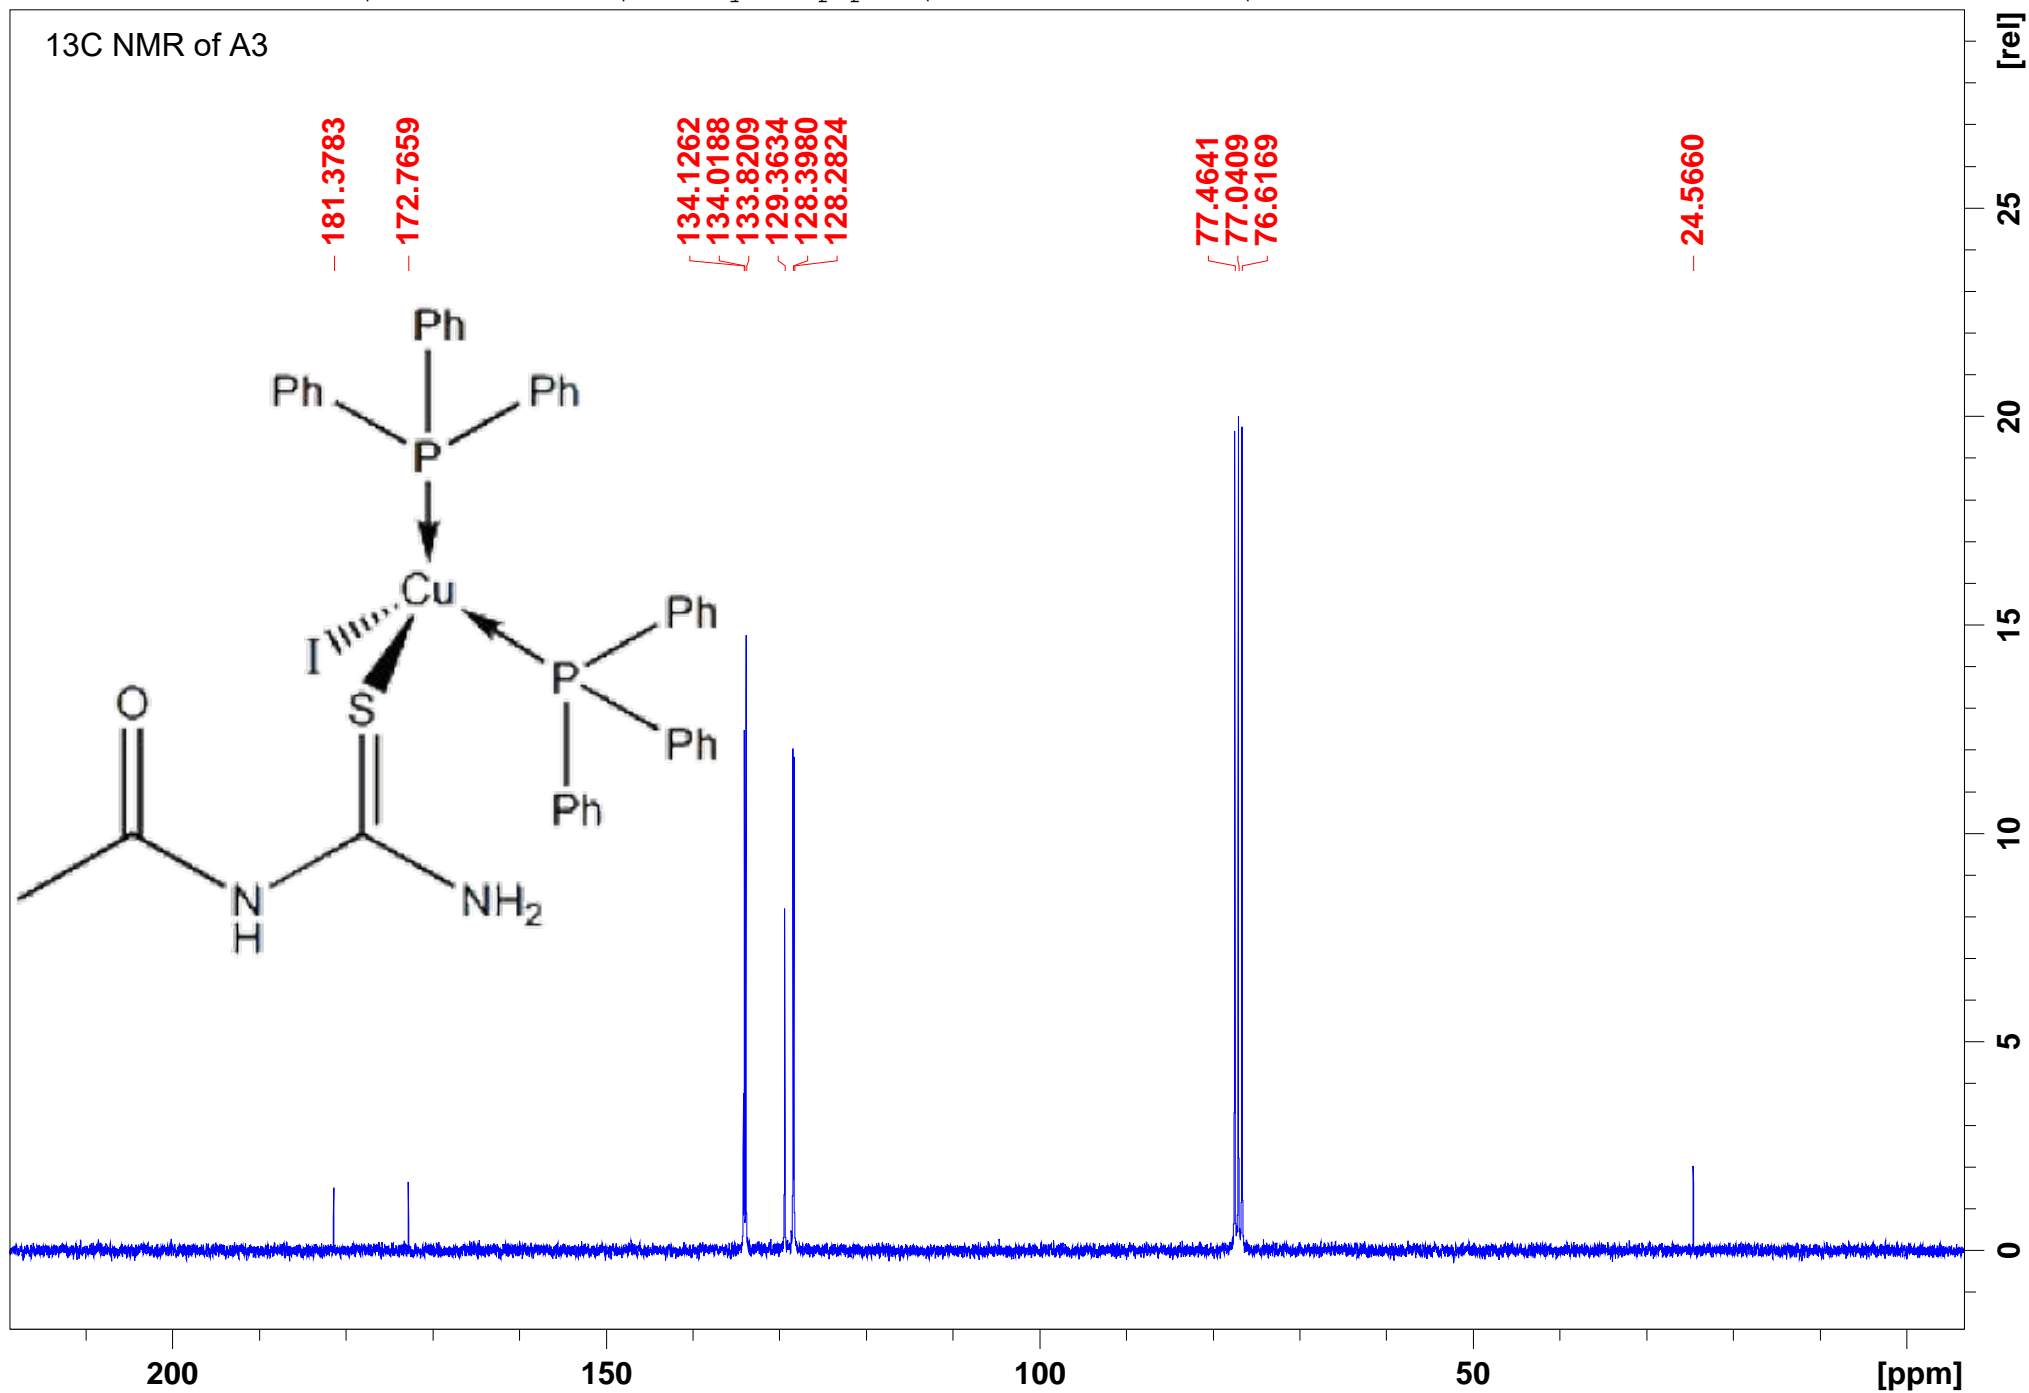

Supplement: c9nj03005k2.pdf [file c9nj03005k2.pdf]

"DZ-IS-4.16(DMSO only)" 1 1 "D:\Data For thesis\Ishtiaq PhD papers\NMR of the Pak work\IS-4.1 to 4.9"

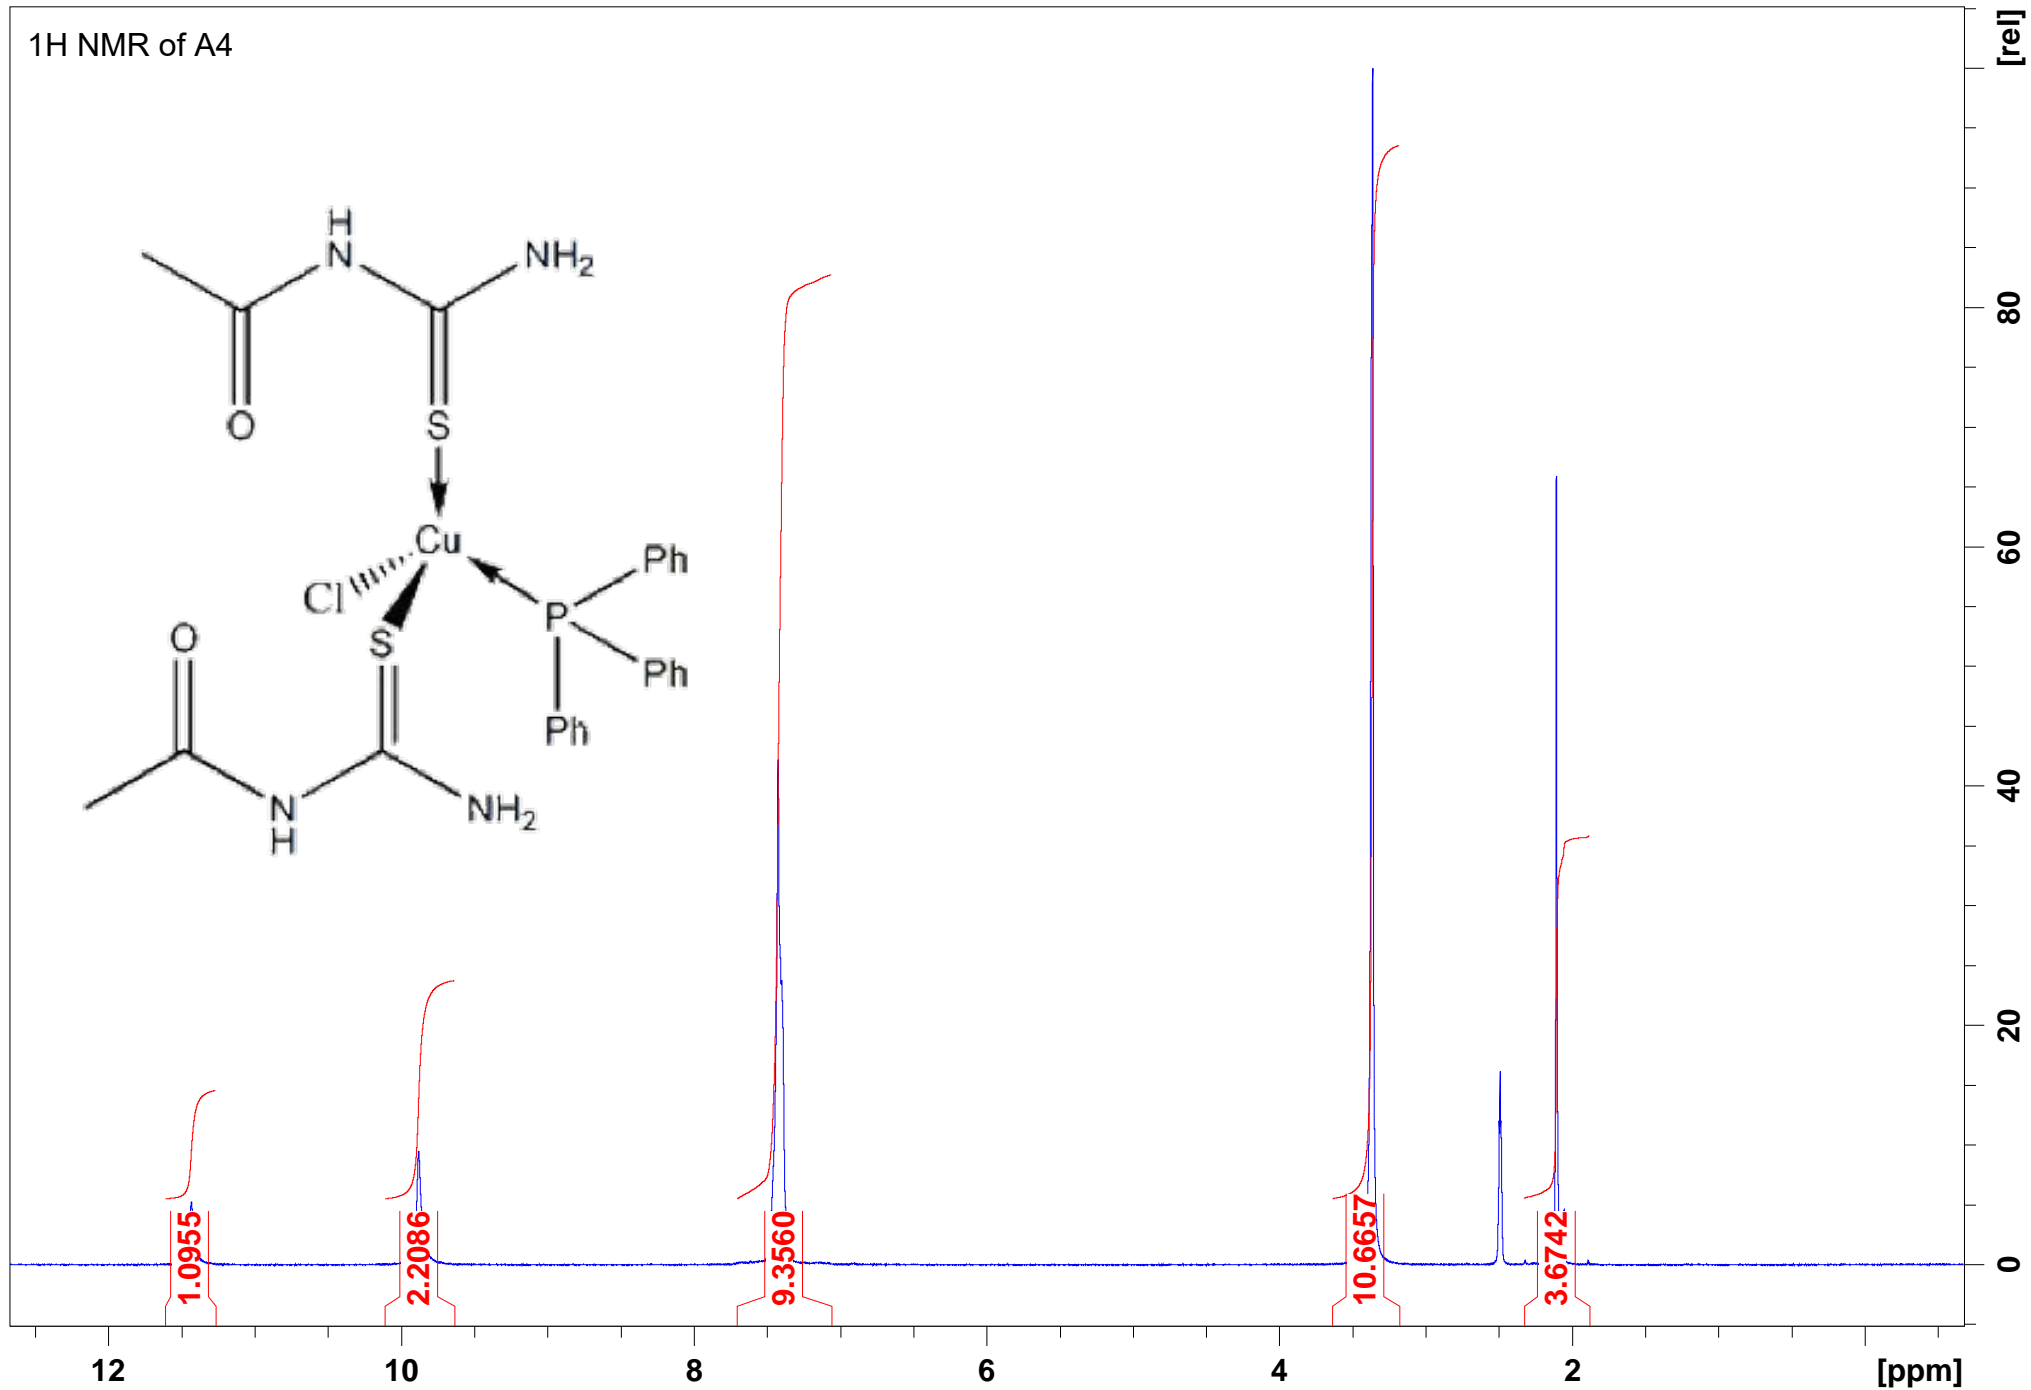

Supplement: c9nj03005k3.pdf [file c9nj03005k3.pdf]

"DZ-IS-4.16(DMSO only)" 2 1 "D:\Data For thesis\Ishtiaq PhD papers\NMR of the Pak work\IS-4.1 to 4.9"

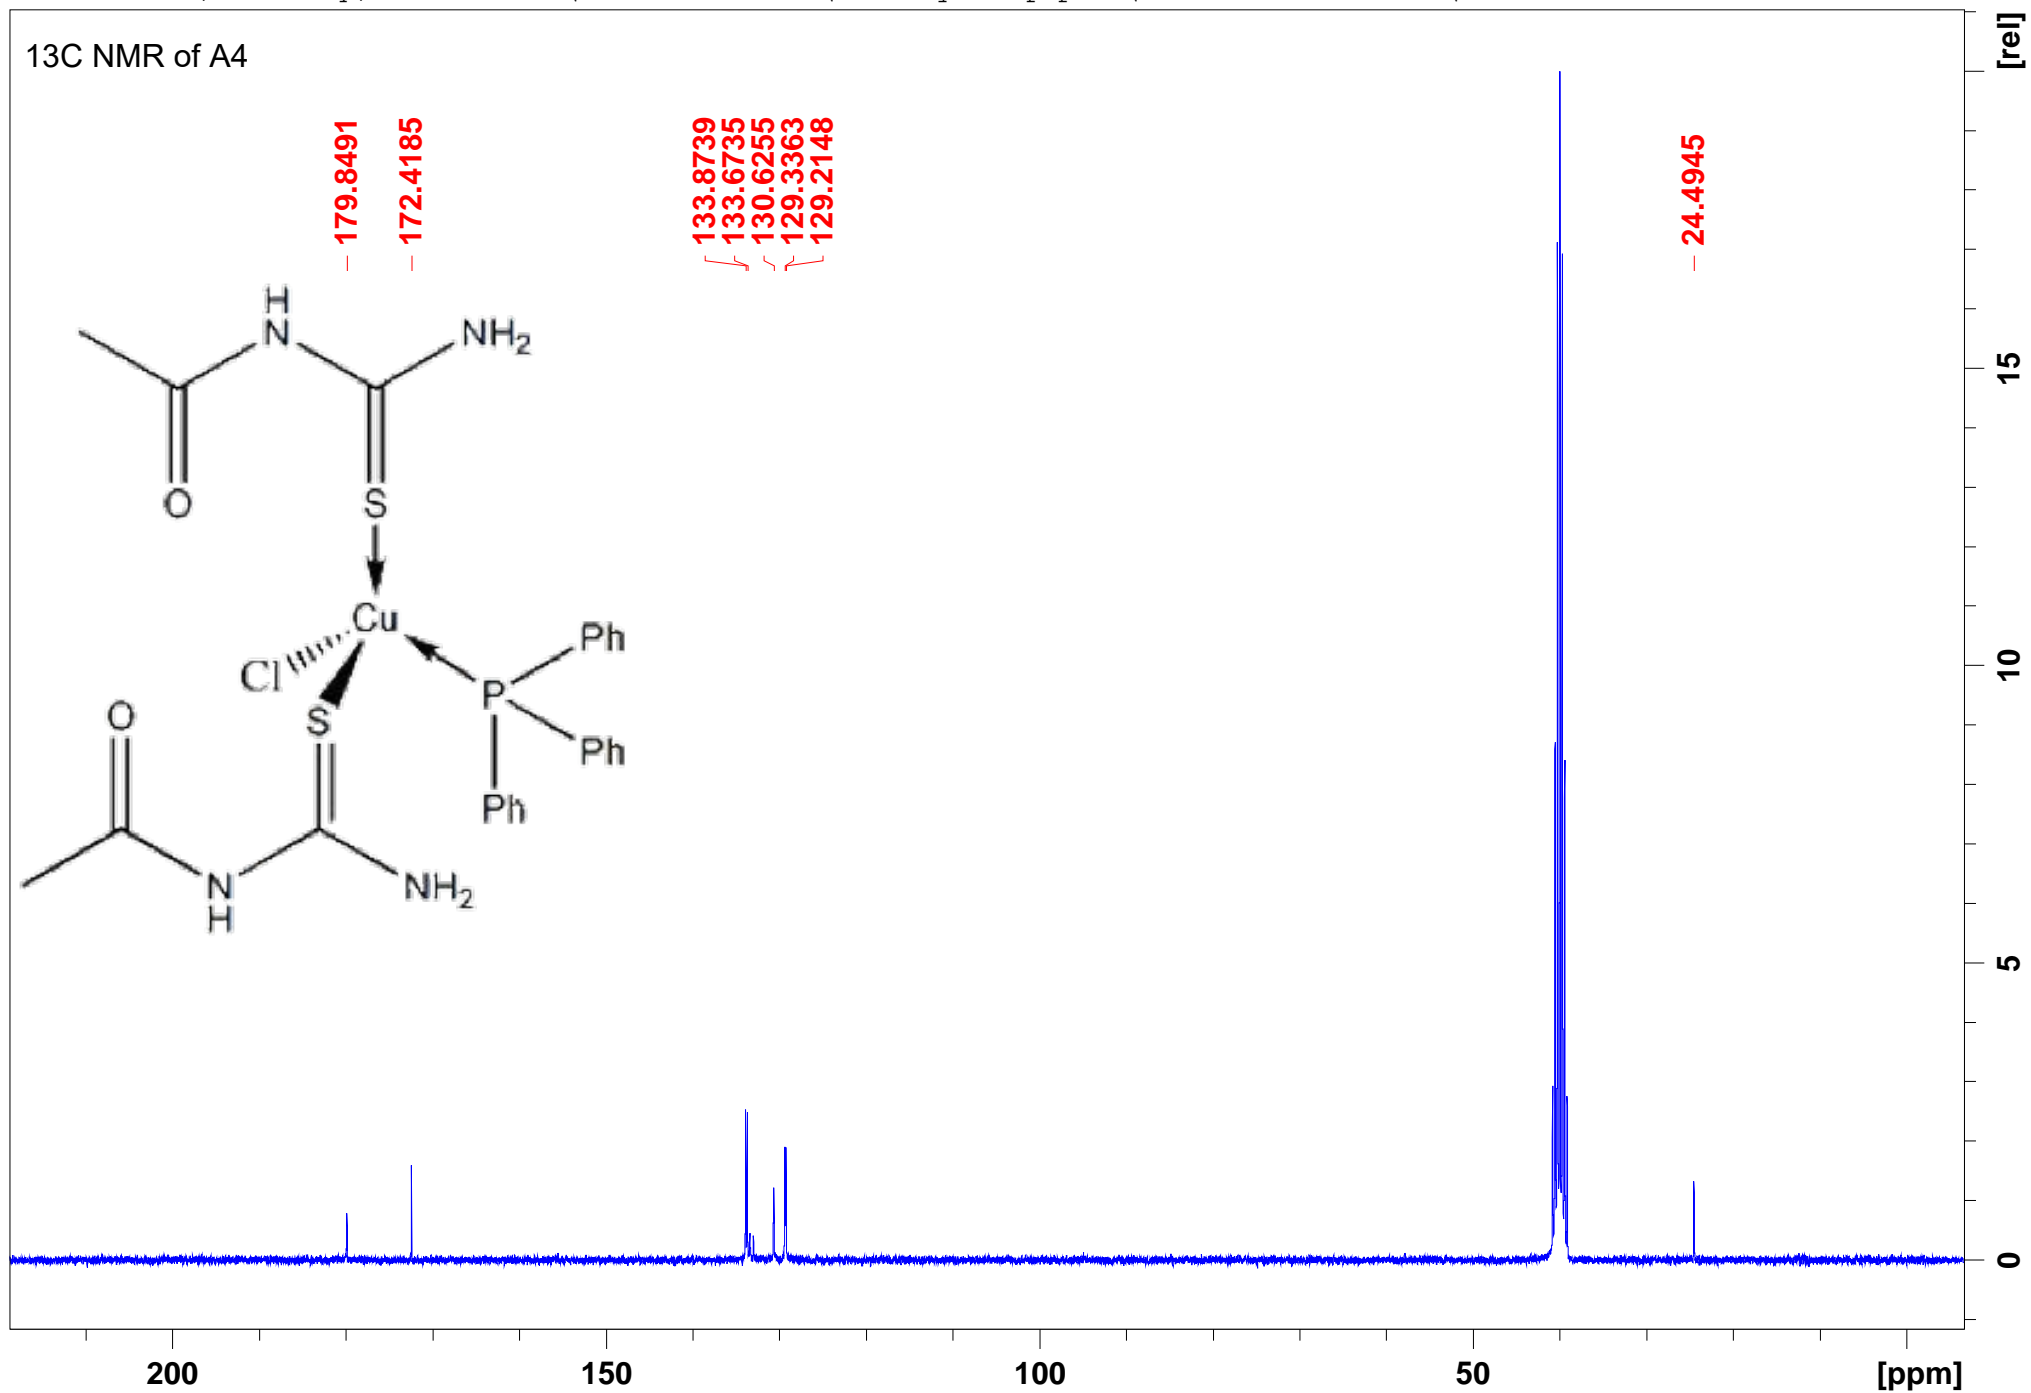

Supplement: c9nj03005k4.pdf [file c9nj03005k4.pdf]

"DZ-IS-4.13 in DMSO" 1 1 "D:\Data For thesis\Ishtiaq PhD papers\NMR of the Pak work\IS-4.1 to 4.9"

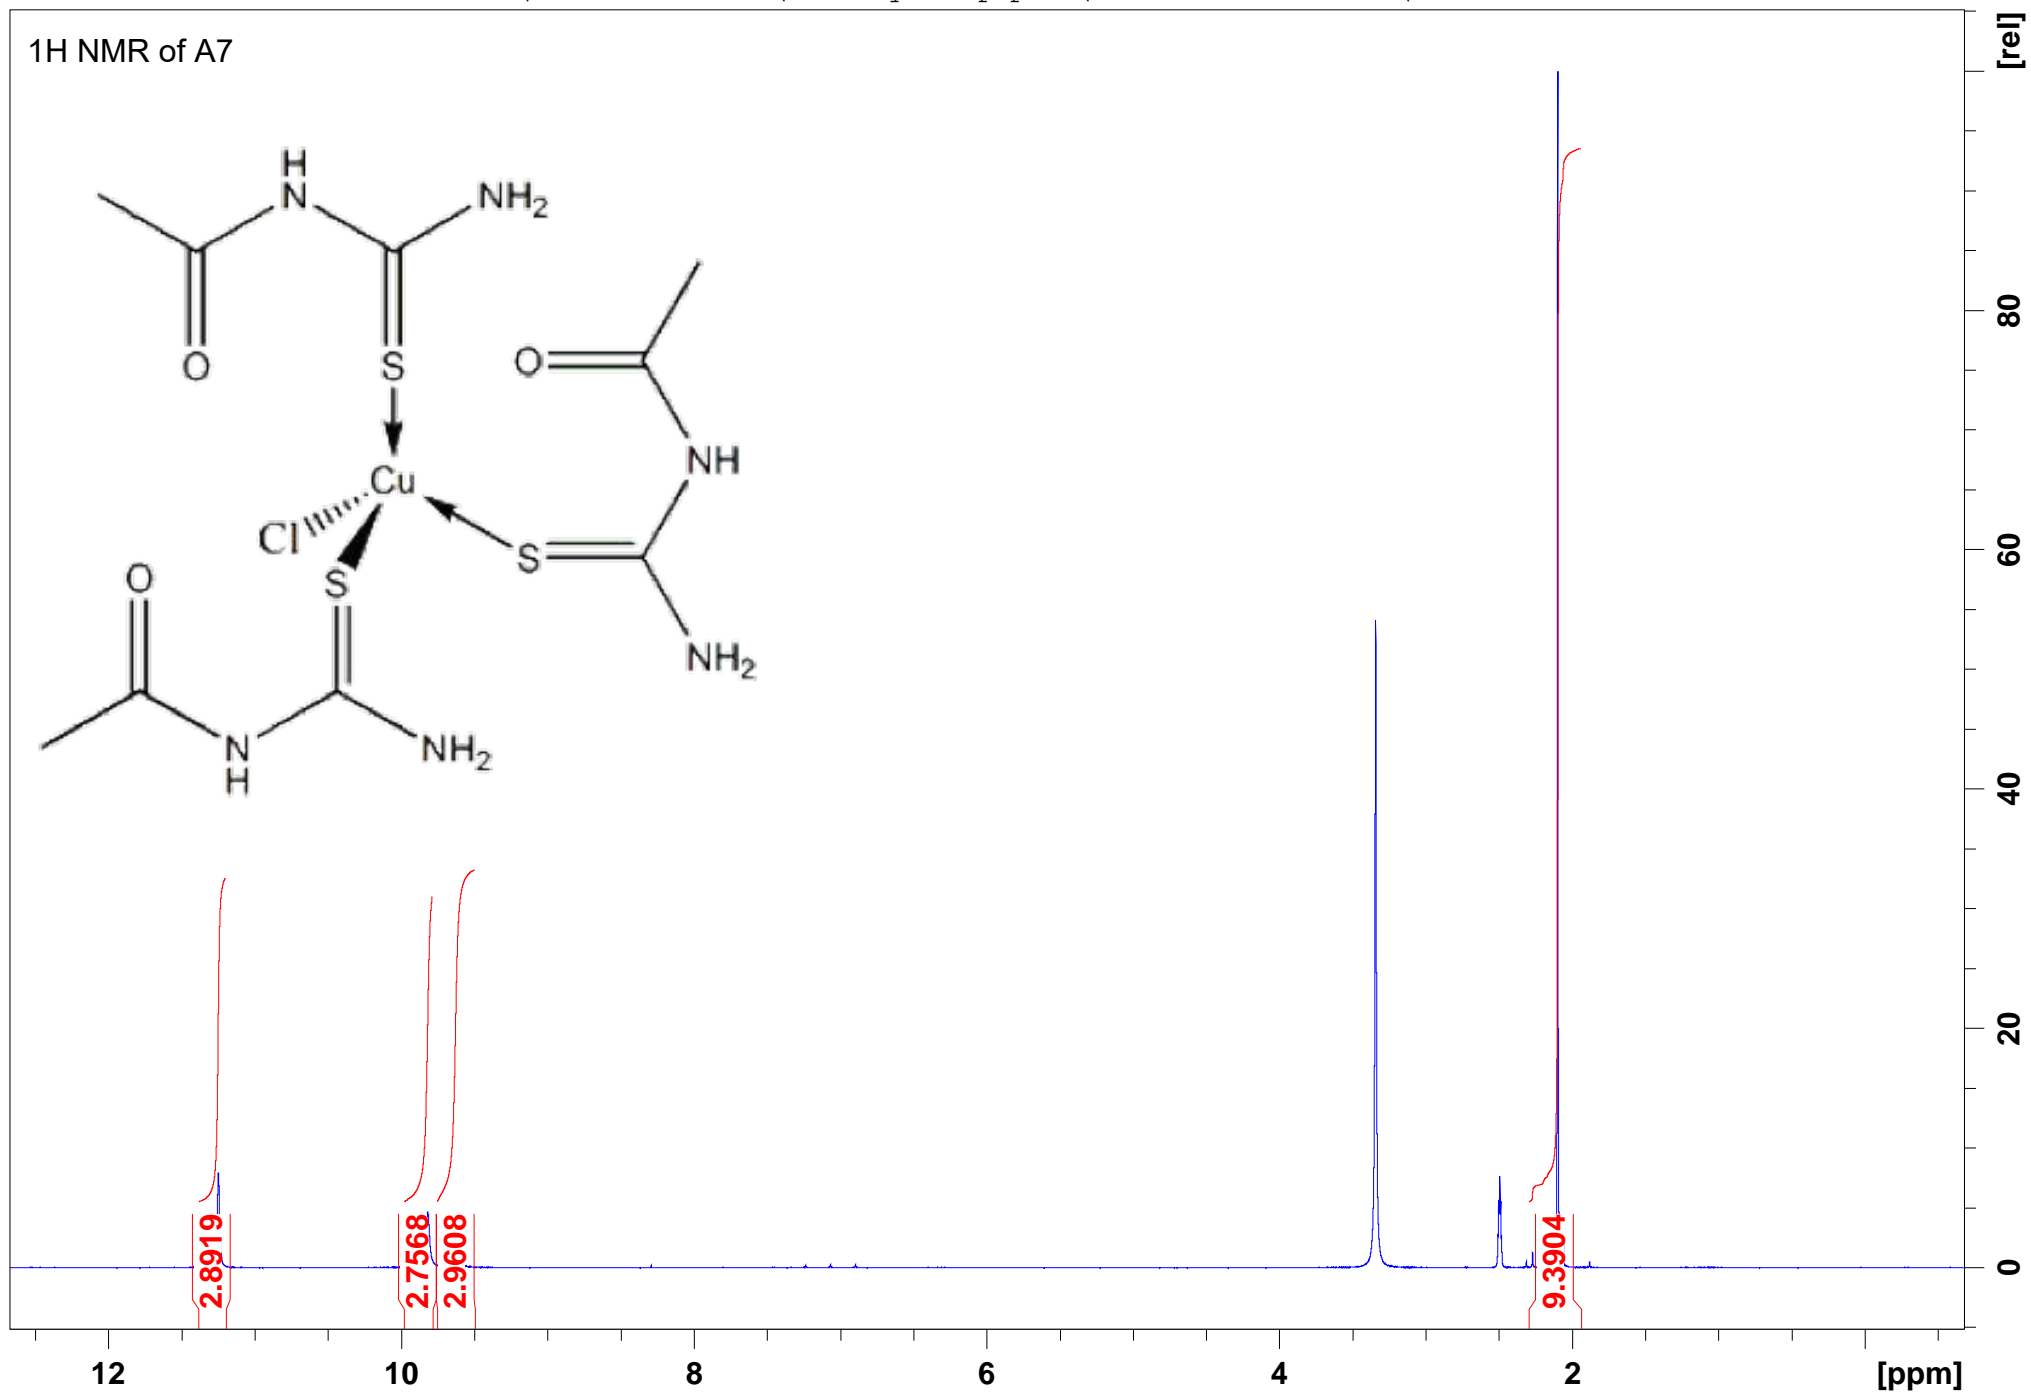

Supplement: c9nj03005k5.pdf [file c9nj03005k5.pdf]

"DZ-IS-4.13 in DMSO" 2 1 "D:\Data For thesis\Ishtiaq PhD papers\NMR of the Pak work\IS-4.1 to 4.9"

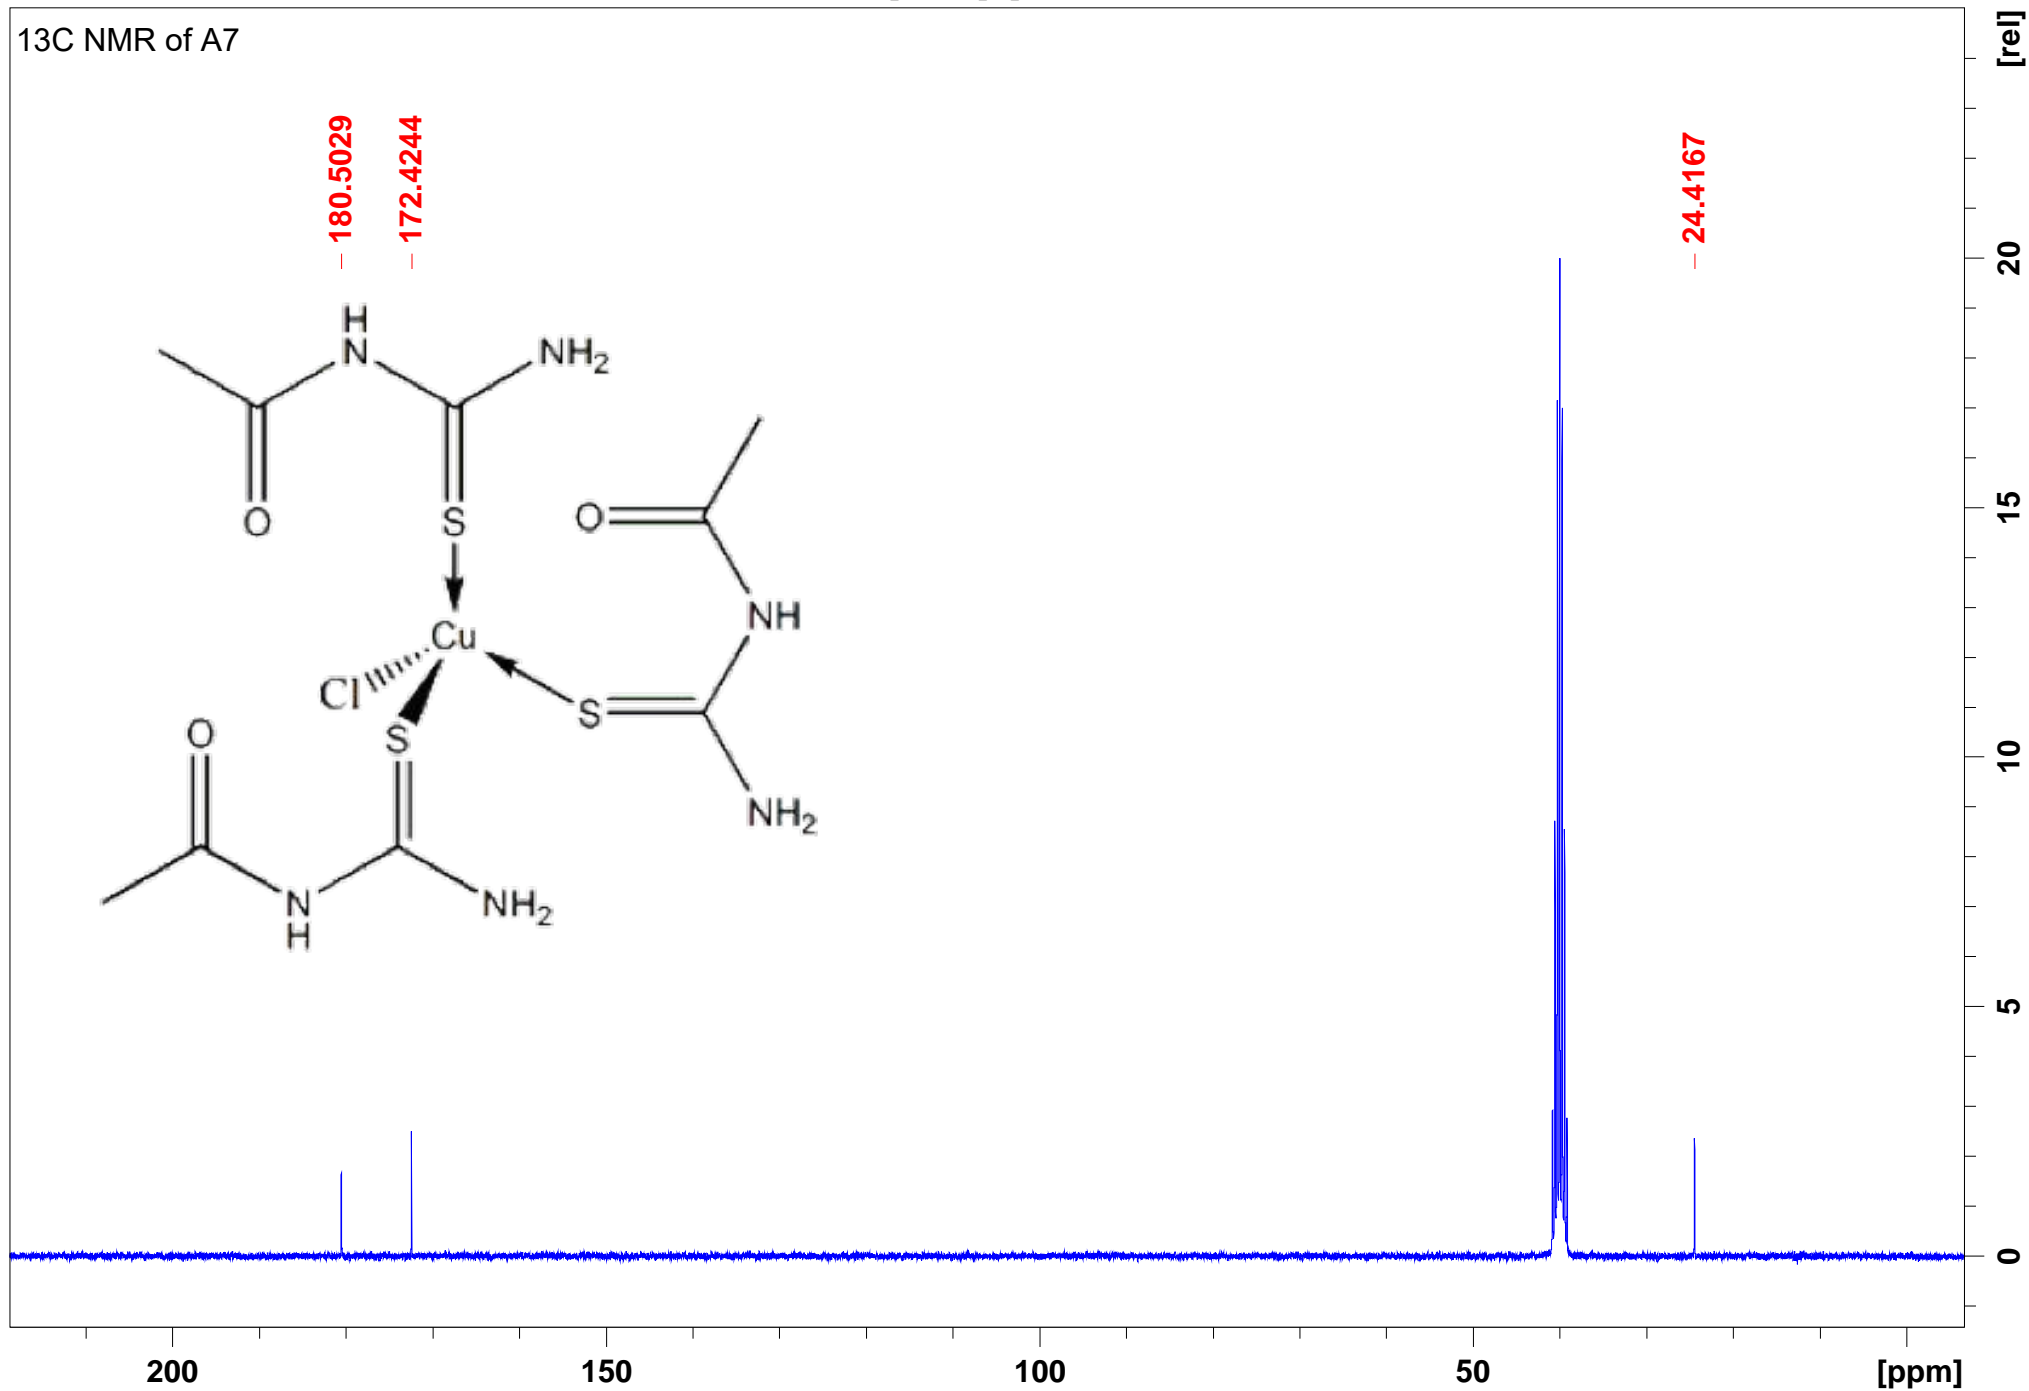

Supplement: c9nj03005k6.pdf [file c9nj03005k6.pdf]

"DZ-IS-4.15 in acetonitrile-d" 1 1 "D:\Data For thesis\Ishtiaq PhD papers\NMR of the Pak work\IS-4.1 to 4.9"

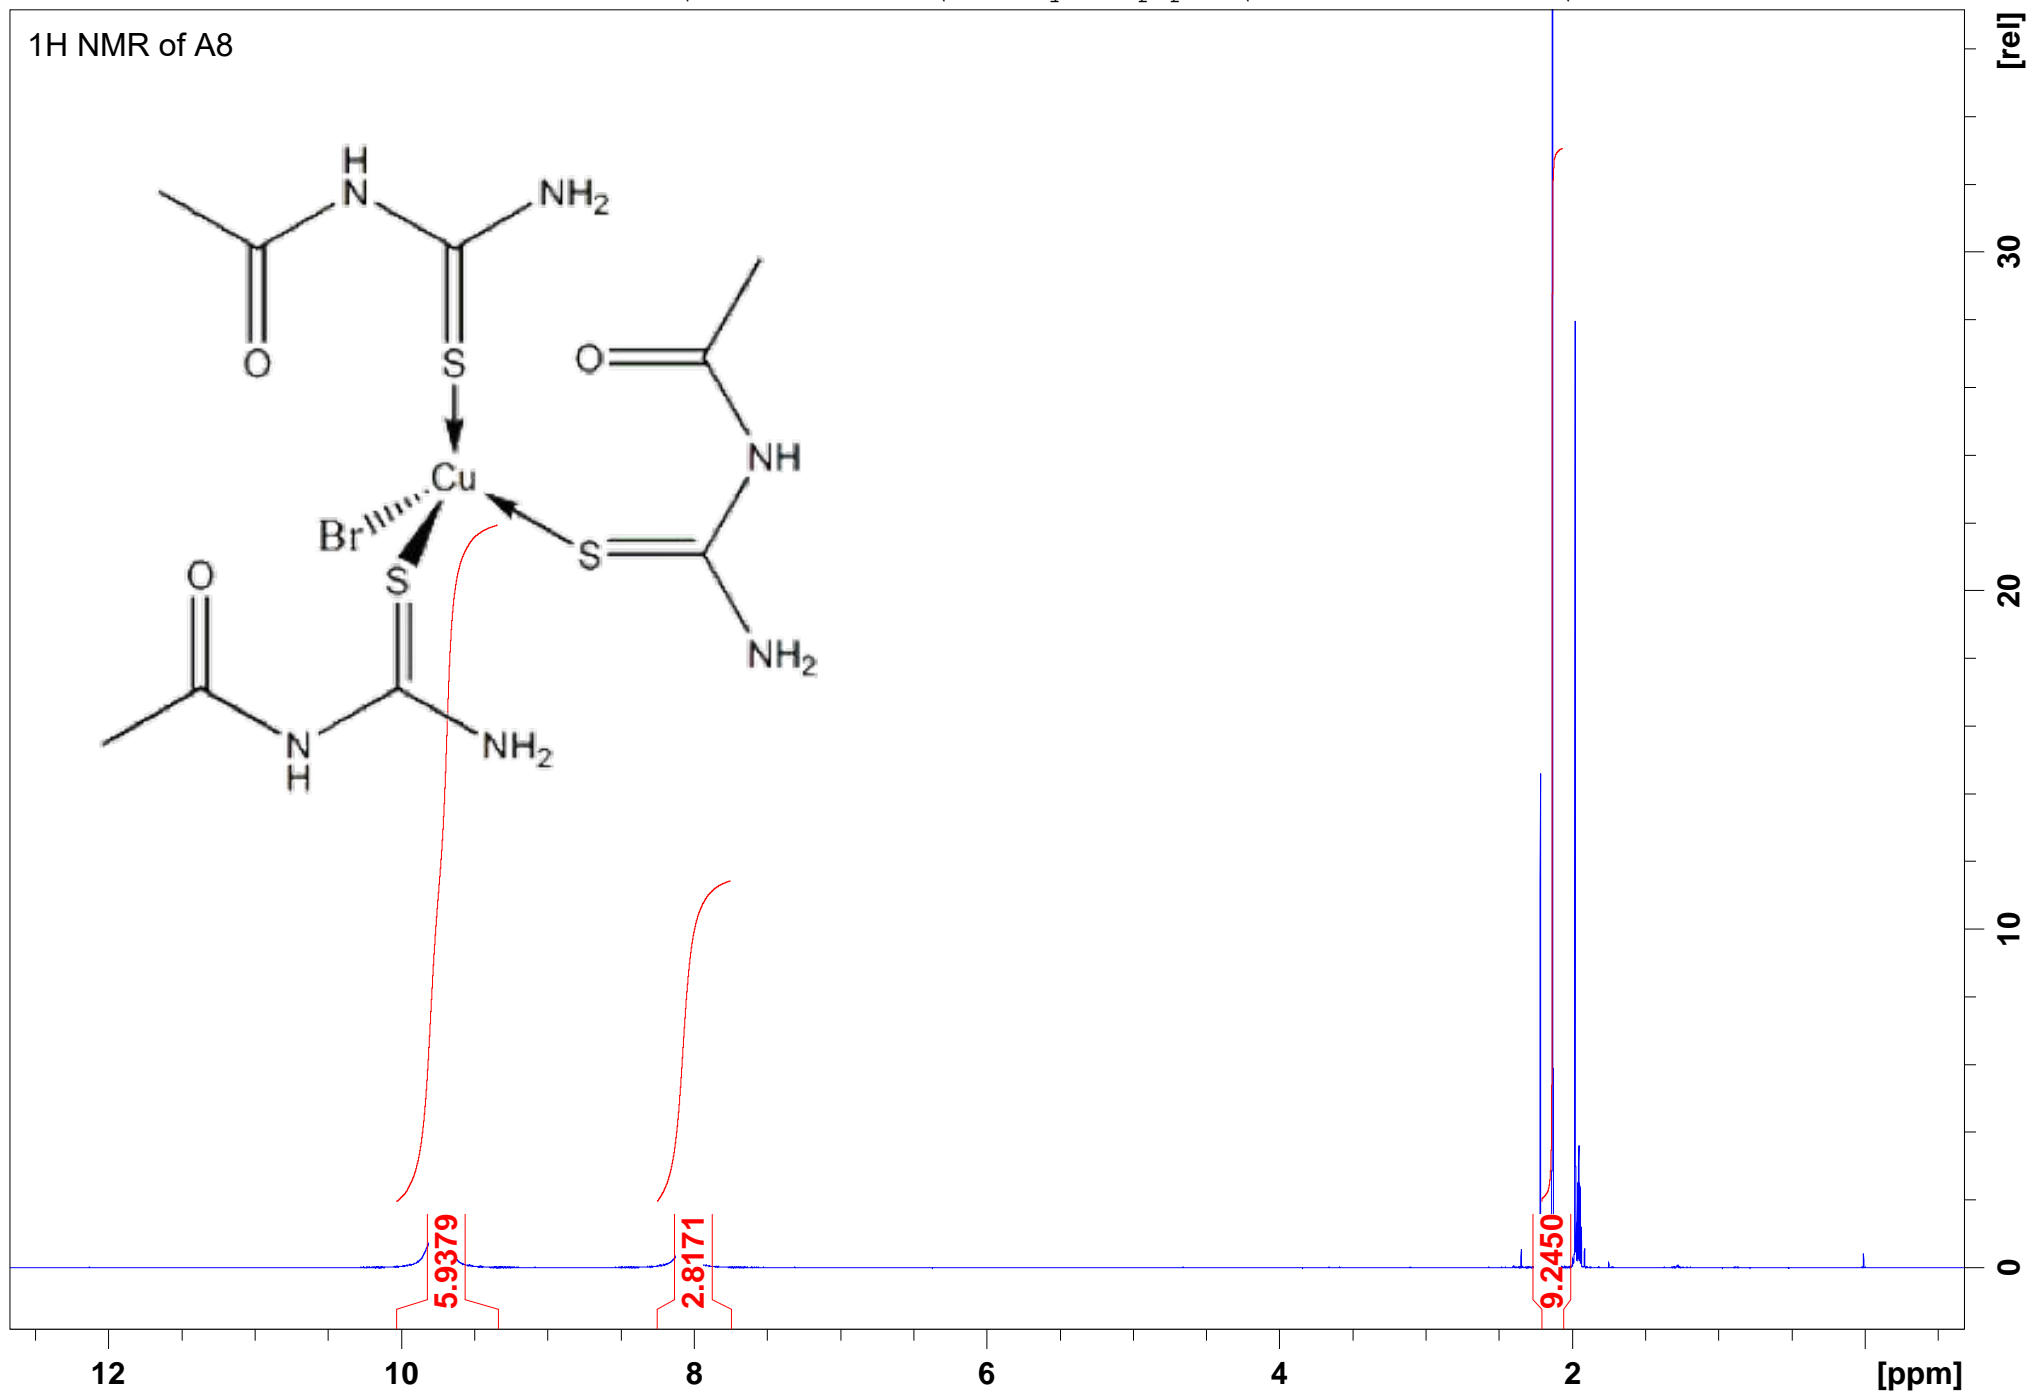

Supplement: c9nj03005k7.pdf [file c9nj03005k7.pdf]

DZ-IS-4.14(DMSO+CDCl3) 2 1 "D:\Data For thesis\Ishtiaq PhD papers\NMR of the Pak work\IS-4.1 to 4.9"

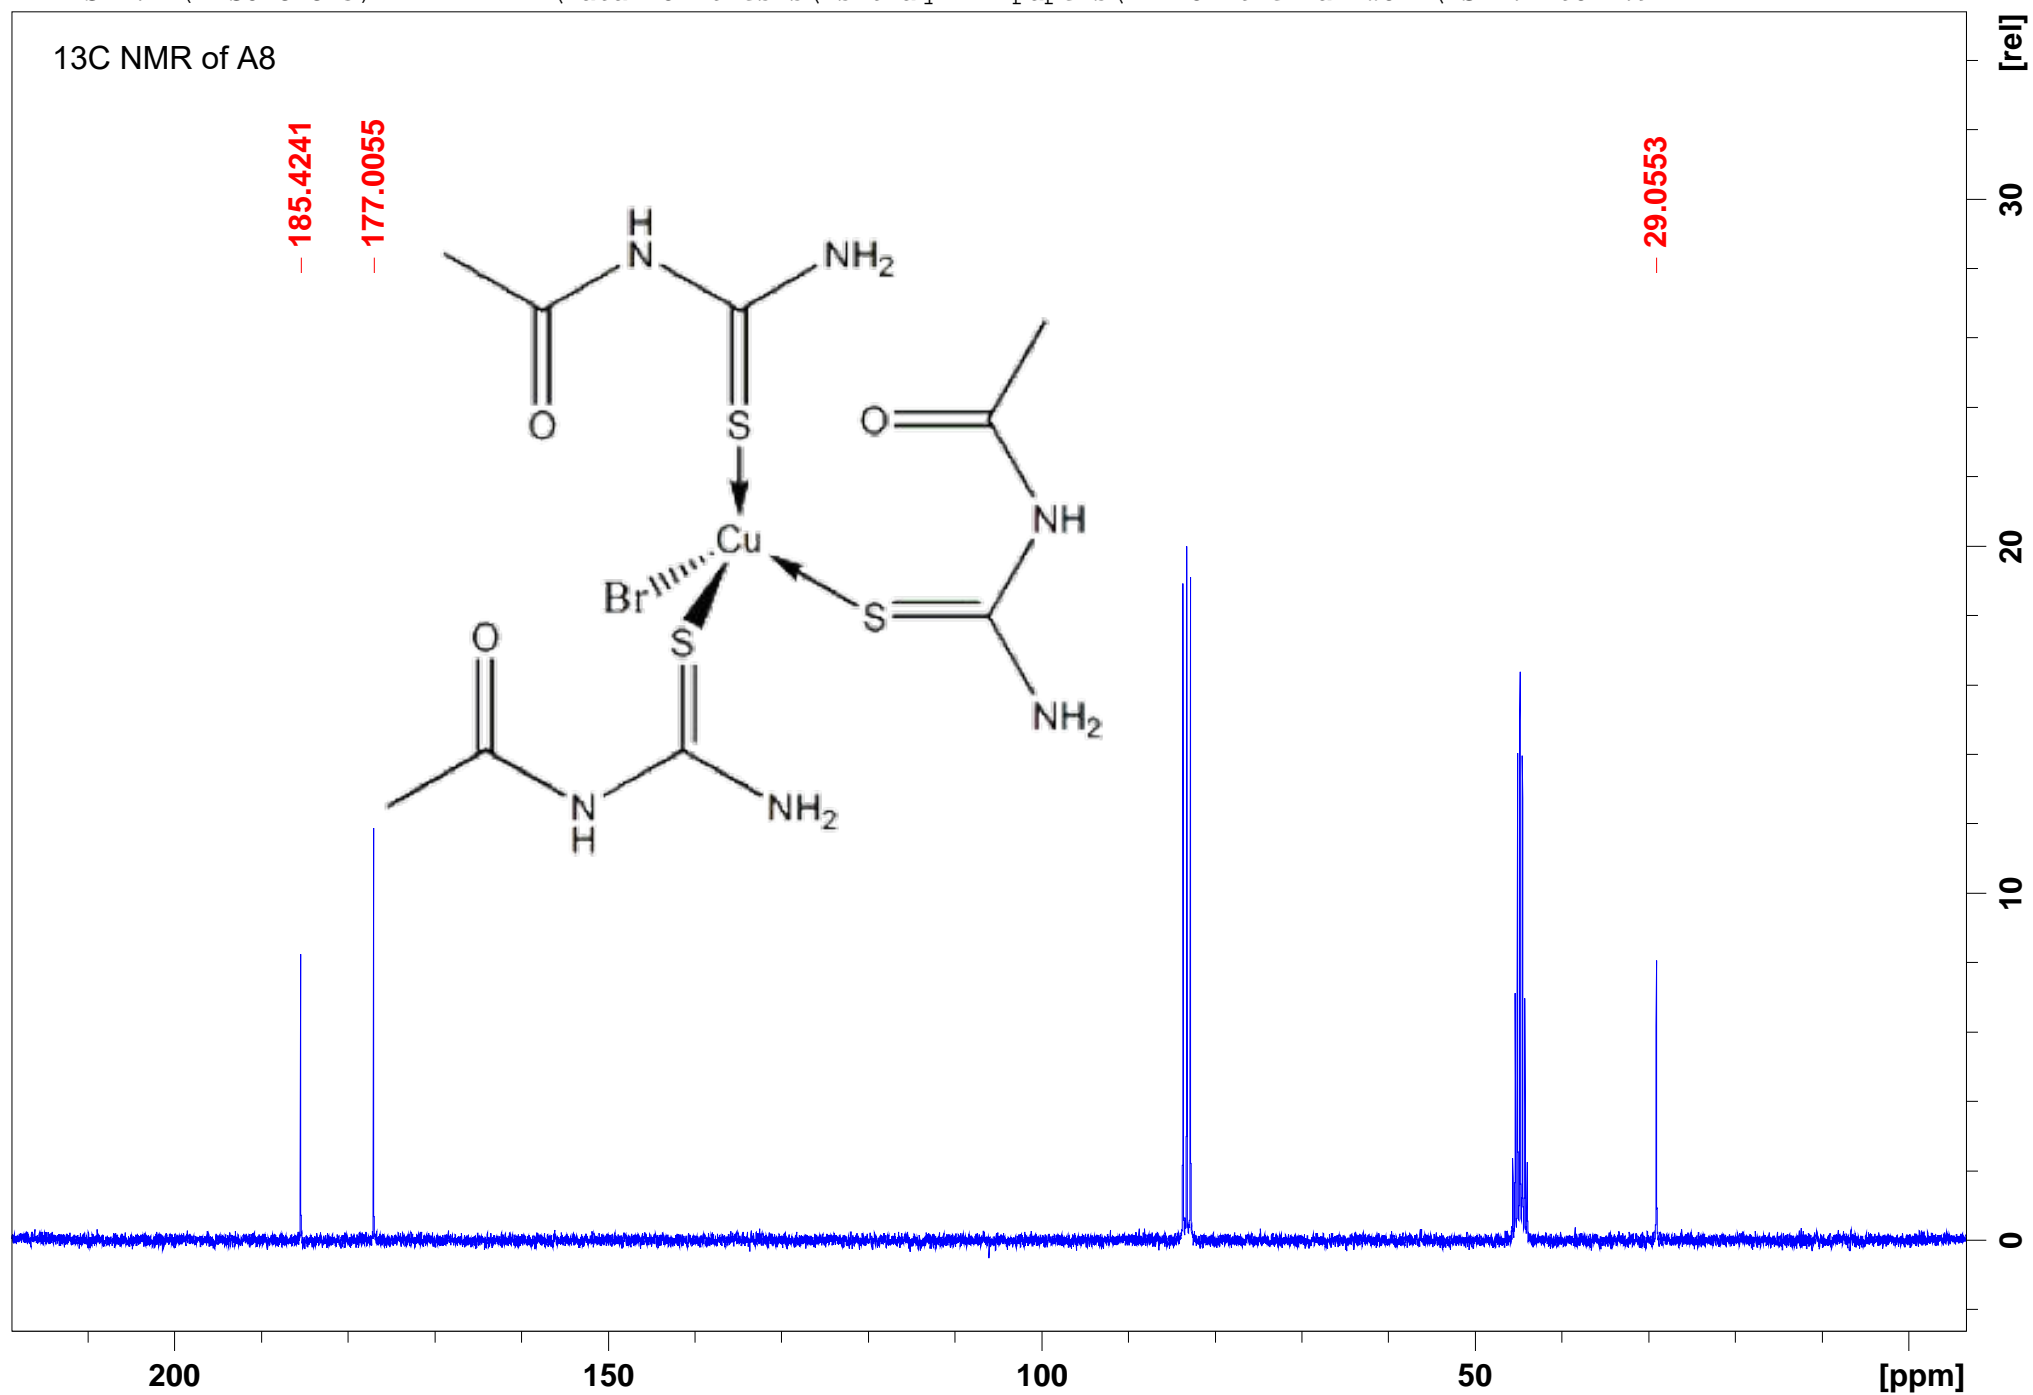

Supplement: c9nj03005k8.pdf [file c9nj03005k8.pdf]
